# Supplementary material for: SARS-CoV-2 Reinfection in a Healthcare Worker Despite the Presence of Detectable Neutralizing Antibodies
Source: PubMed Central journal article supplement (PMC8070424; doi:10.3390/v13040661), 2021-04-12
Supplement: viruses-13-00661-s001.pdf [file viruses-13-00661-s001.pdf]

**Table S1.** Serological results

| <b>Date</b> | <b>Indirect immunofluorescence assay</b><br>[antibody titer] |            |            | <b>Neutralisation assay</b><br>[titer IC50] |                 |
|-------------|--------------------------------------------------------------|------------|------------|---------------------------------------------|-----------------|
|             | <b>IgG</b>                                                   | <b>IgM</b> | <b>IgA</b> | <b>HH-1</b>                                 | <b>HH-24.II</b> |
| 02.07.20    | 640                                                          | 80         | <20        | 80                                          | 160             |
| 30.07.20    | 1280                                                         | <20        | <20        | 160                                         | 160             |
| 14.10.20    | 640                                                          | <20        | <20        | 80                                          | 160             |
| 29.12.20    | 320                                                          | <20        | <20        | 80                                          | 320             |
| 13.01.21    | 2560                                                         | <20        | <20        | 1280                                        | 2560            |
| 28.01.21    | 1280                                                         | <20        | <20        | 1280                                        | 2560            |

**Table S2.** Laboratory parameters at the time of reinfection

| <b>Parameter</b>              | <b>Normal range</b> | <b>Value</b> |
|-------------------------------|---------------------|--------------|
| WBC ( $10^9/L$ )              | 3.8 – 11.0          | 3.6          |
| Neutrophil count ( $10^9/L$ ) | 1.5 – 7.7           | 1.5          |
| Lymphocytes ( $10^9/L$ )      | 1.0 – 3.6           | 1.5          |
| T cells ( $/\mu L$ )          | 900 – 2900          | 1155         |
| CD4+ cells ( $/\mu L$ )       | 500 – 1350          | 831          |
| CD8+ cells ( $/\mu L$ )       | 290 – 930           | 268          |
| CD4+/CD8+ ratio               | 0.6 – 3.6           | 3.1          |
| B cells ( $/\mu L$ )          | 80 – 500            | 200          |
| NK cells ( $/\mu L$ )         | 35 – 350            | 140          |
| Platelets ( $10^9/L$ )        | 150 – 400           | 222          |
| Hemoglobin (g/dL)             | 12.3 – 15.3         | 11.3         |
| HbA1C (%)                     | 4.8 – 5.6           | 5.7          |
| C-reactive protein (mg/L)     | <5                  | <4           |
| Procalcitonin ( $\mu g/L$ )   | <0.5                | <0.02        |
| Interleukin 6 (ng/L)          | <4.4                | <2.7         |
| Ferritin ( $\mu g/L$ )        | 10.0 – 291.0        | 9.2          |
| IgG (g/L)                     | 6.5 – 16.0          | 16.0         |
| IgA (g/L)                     | 0.4 – 3.5           | 1.6          |
| IgM (g/L)                     | 0.5 – 3.0           | 0.6          |

**Table S3.** Variant description

|                 | <b>Variants</b>                                                                                                                                                                 | <b>Amino acid substitution</b>                                                                       | <b>Nextstrain clade</b> | <b>Pangolin lineage</b> |
|-----------------|---------------------------------------------------------------------------------------------------------------------------------------------------------------------------------|------------------------------------------------------------------------------------------------------|-------------------------|-------------------------|
| <b>HH-24.I</b>  | G1440A, G2891A                                                                                                                                                                  | ORF1a: G392D<br>ORF1a: A876T                                                                         | 19A                     | B.3                     |
| <b>HH-24.II</b> | G204T, C241T, T445C,<br>C3037T, T3592C,<br>C6286T, C12076T,<br>C13517T, C14408T,<br>C19386T, G21255C,<br>C22227T, A23403G,<br>C25886T, C26801G,<br>C27944T, C28932T,<br>G29645T | ORF1b: T17I<br>ORF1b: P314L<br>S: A222V<br>S: D614G<br>ORF3a: S165F<br>ORF9(N): A220V<br>ORF10: V30L | 20E (EU1)               | B.1.177                 |
